# Supplementary material for: Morphotype-specific effector functions of Cryptococcus neoformans PUM1
Source: PubMed Central journal article supplement (PMC4806291; doi:10.1038/srep23638), 2016-03-24
Supplement: srep23638-s1.pdf [file srep23638-s1.pdf]

## Supplementary Information

### **Morphotype-specific effector functions of *Cryptococcus neoformans* PUM1**

Jan Naseer Kaur and John C. Panepinto\*

Department of Microbiology and Immunology, Witebsky Center for Microbial  
Pathogenesis and Immunology, Jacobs School of Medicine and Biomedical Sciences,  
University at Buffalo, the State University of New York

**Supplementary Material:**

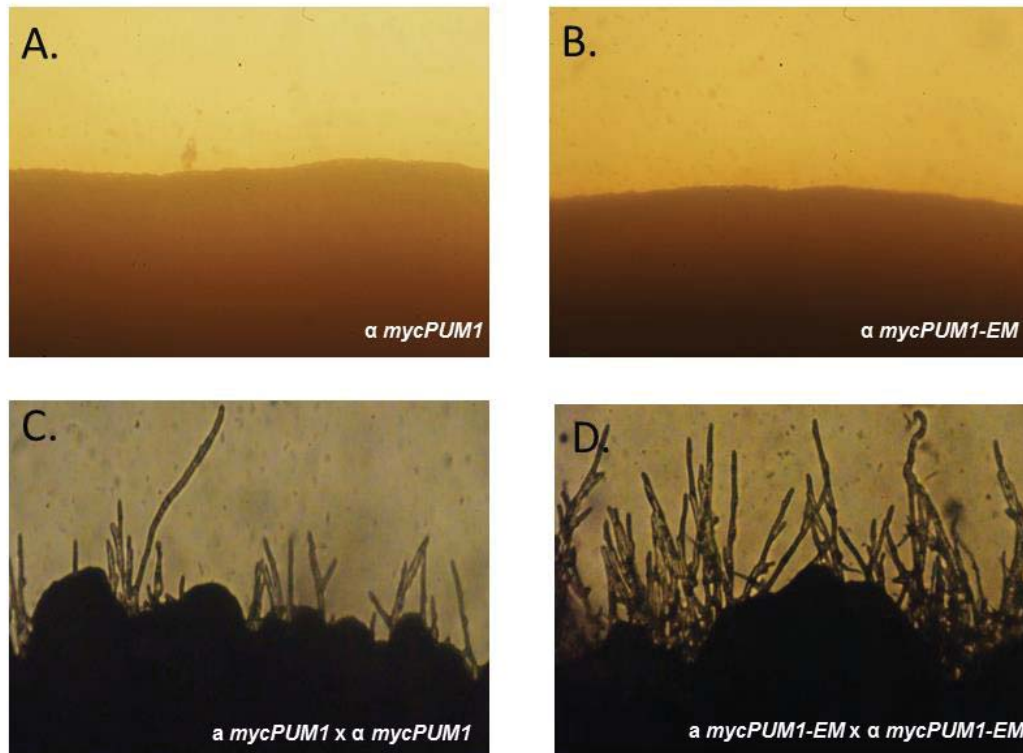

**Fig. S1: De-repression of *PUM1* is not sufficient to induce filamentation in the absence of opposite mating partner.**

Equal number of  $\alpha$  mating type alone (A and B) and co-culture of  $\alpha$  and **a** mating partners (C and D) of *mycPUM1* (A and C) and *mycPUM1-EM* (B and D) were spotted on to the V8 mating media for 72 hours in dark at room temperature. Filamentation was assessed by light microscopy at 100X magnification.

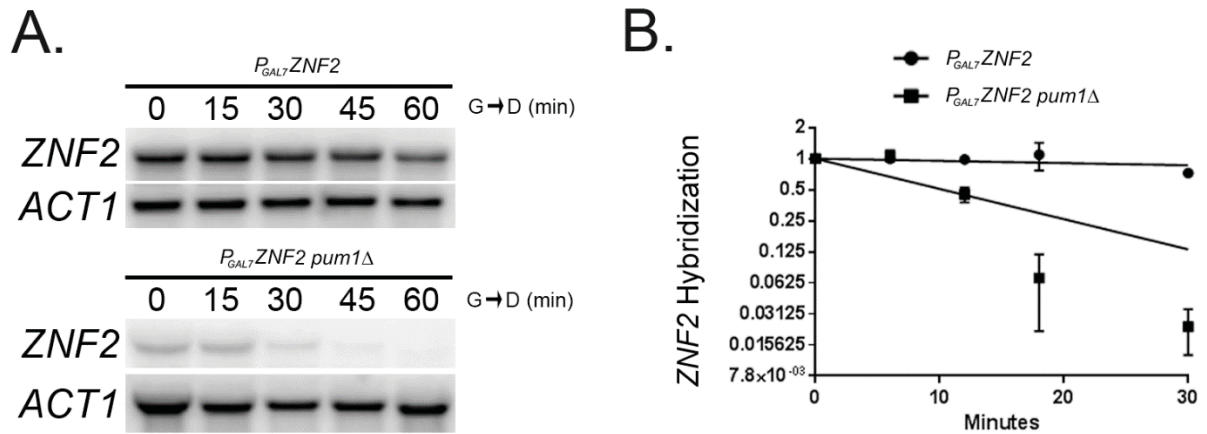

**Fig. S2: *PUM1* positively regulates the stability of *ZNF2***

(a) Northern analysis of *ZNF2* stability in the  $P_{GAL7}ZNF2$  and  $P_{GAL7}ZNF2 pum1\Delta$  strains after transcriptional shutoff (YPD). The hybridization level of the *ZNF2* was normalized to the actin levels to determine the change in transcript stability over time. (b) Log 2 plot of relative expression of *ZNF2* transcript normalized to the actin hybridization was used to generate the decay curve. The graph shown is the representative of two biological replicates.

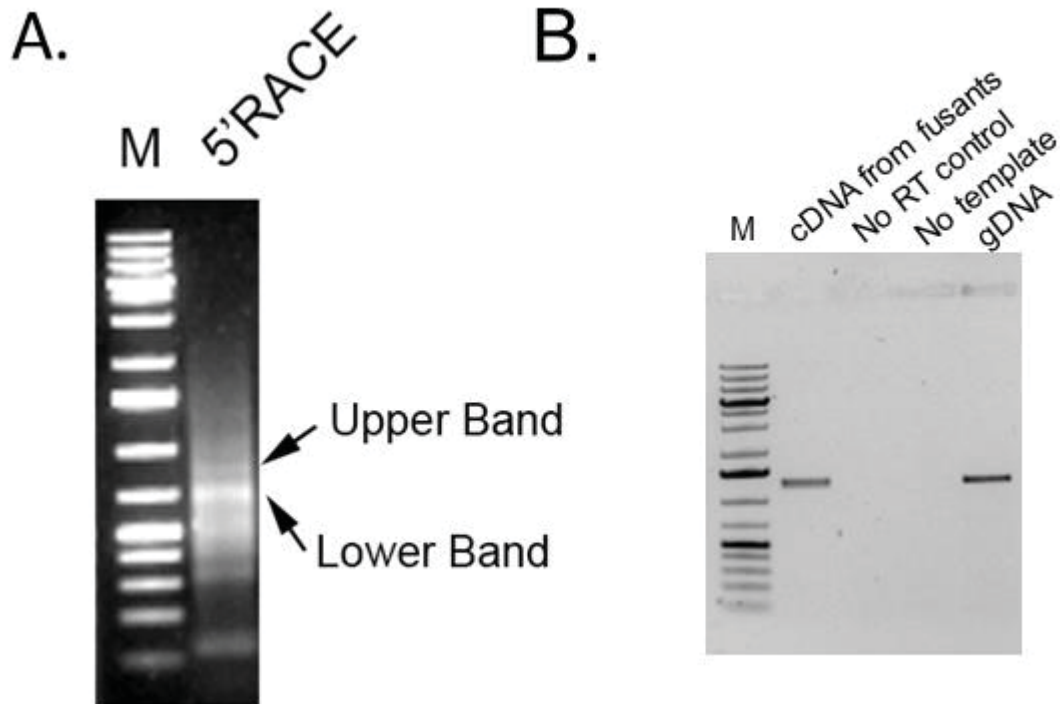

**Fig. S3: Analysis of alternative *PUM1* mRNA**

(a) 5' *PUM1* RACE was performed from midlog culture of  $P_{GAL7}ZNF2$  induced for 3 hours in YP-Gal using GeneRacer® Kit. The RACE-PCR product was subjected to agarose gel electrophoresis. The two dominant bands obtained, marked with the arrows, were excised from the gel, purified and cloned into pJET for conventional sequencing. (b) RT-PCR from the cDNA transcribed from wild type mating RNA was performed using a forward primer within the 1 kb intron and a reverse primer downstream of the adjacent 50 bp intron. The size of the amplicon obtained from the mating cDNA (lane1) was comparable to that of the gDNA (lane4) suggesting that the 1kb intron is retained. No amplification was detected in the no-RT (lane2) and no-template (lane3) controls.

**TABLE S1: STRAINS**

|                                     |                                                           |
|-------------------------------------|-----------------------------------------------------------|
| H99                                 | Peter Williamson, University of Illinois at Chicago/NIAID |
| KN99                                | Joe Heitman, Duke University                              |
| H99 <sup>NAT</sup>                  | Joe Heitman, Duke University                              |
| KN99 <sup>NEO</sup>                 | Joe Heitman, Duke University                              |
| <i>α pum1Δ</i>                      | This study                                                |
| <i>a pum1Δ</i>                      | This study                                                |
| <i>α pum1Δ Nat</i>                  | This study                                                |
| <i>a pum1Δ Neo</i>                  | This study                                                |
| <i>α pum1Δ::mChPUM1</i>             | This study                                                |
| <i>a pum1Δ::mChPUM1</i>             | This study                                                |
| <i>α pum1Δ::mycPUM1</i>             | This study                                                |
| <i>a pum1Δ::mycPUM1</i>             | This study                                                |
| <i>α pum1Δ::RBDΔmycPUM1</i>         | This study                                                |
| <i>a pum1Δ::RBDΔmycPUM1</i>         | This study                                                |
| <i>α pum1Δ::EM mycPUM1</i>          | This study                                                |
| <i>a pum1Δ::EMmycPUM1</i>           | This study                                                |
| P <sub>GAL7</sub> ZNF2              | This study                                                |
| P <sub>GAL7</sub> ZNF2 <i>pum1Δ</i> | This study                                                |

**TABLE S2: PRIMERS**

| NAME                                 | SEQUENCE                                                     |
|--------------------------------------|--------------------------------------------------------------|
| <i>PUM1</i> KO 5' Arm F              | TAATAATCTAGACCAGCTTATCACCGAATTGC                             |
| <i>PUM1</i> KO 5' Arm RC             | TAATAAAGATCTGCAATAGCCATCTCCTGC                               |
| <i>PUM1</i> KO 3' Arm F              | TAATAAGGTACCCAAAGCTGCATCCCTGGG                               |
| <i>PUM1</i> KO 3' Arm RC             | TAATAACTCGAGCCTCCTCGTCGAACTCACC                              |
| <i>PUM1</i> Myc F                    | CATTGAAGGGTGGGAGCAGAAGCTTATCTCTGAGGAGGACCTTTAGTGATTAATCTCTCG |
| <i>PUM1</i> Myc RC                   | CGAGAGATTAATCACTAAAGGTCCTCCTCAGAGATAAGCTTCTGCTCCCACCCTTCAATG |
| <i>PUM1</i> mCherry F                | AGGACGACATTGAAGGGTGGATGGTGAGCAAGGGCGAGG                      |
| <i>PUM1</i> mCherry RC               | TAATAATCTAGACCCTCTTCACGTGGACGC                               |
| EM SDM F                             | GAAGGGATTGGGCAAACGACAAAACATACGCATTCGGACTCTC                  |
| EM SDM RC                            | GAGAGTCCGAATGCGTATGTTTTGTCGTTTGCCCAATCCCTTC                  |
| <i>PUM1</i> RBD SDM F                | CGACACAAATTCGCCGCCGCGTCTGTTGCCAAGGCCCTCATTACAG               |
| <i>PUM1</i> RBD SDM RC               | CGTGAATGAGGGCCTTGGCAACGACGGCGGGCGGAATTTGTGTCC                |
| <i>PUM1</i> Rec. RBD <sub>p</sub> F  | TAATAAGGATCCTATGTCTCAATATCCGGGTAGGC                          |
| <i>PUM1</i> Rec. RBD <sub>p</sub> RC | TAATAAGGATCCTTACTCGTTCTCCATCTGGGC                            |
| <i>PUM1</i> F                        | CTGGTGTGGTCGGGAGC                                            |
| <i>PUM1</i> RC                       | CCGTATACCACACTGCAGCC                                         |
| <i>PUM1</i> RACE 5' end              | CGAGCTTCTGCTGGATAAATCG                                       |
| <i>PUM1</i> RACE 3' end              | GAAGGACGACATTGAAGGG                                          |
| <i>ZNF2</i> Not1 F                   | TAATAAGCGGCCGCGCCAGCTTTAGCTCAAATCG                           |
| <i>ZNF2</i> Sal1 RC                  | TAATAAGTCGACGGAAGTCTTATTATGGGCGAGG                           |
| RT PCR F                             | GGGGTGTGGTGGGTTCCG                                           |

RT PCR RC

CGACGAAATGAGGGGCAGG
